# Supplementary material
Source: Springer Nature journal article supplement (https://www.springermedizin.de/resource/supplementary/12891_2013_2121_MOESM7_ESM.docx/9509460)
Supplement: MOESM7 [file 9509460]

|  | **OCD grading** | **FFI (reverse)** | **CFSS** | **AOFAS** | **KLS** | **AOSS** |
| --- | --- | --- | --- | --- | --- | --- |
| **MMP-13 / MMP-13/TPC** | | | | | | |
| correlation | - / - | - / - | - / - | - / - | - / - | - / - |
| valid cases | 28 | 28 | 28 | 28 | 28 | 25 |
| signif. (P) | n.s. / n.s. | n.s. / n.s. | n.s. / n.s. | n.s. / n.s. | n.s. / n.s. | n.s. / n.s. |
| **IL-1β / IL-1β/TPC** | | | | | | |
| correlation | neg. / - | - / - | - / - | - / - | - / - | - / - |
| valid cases | 28 | 28 | 28 | 28 | 28 | 25 |
| signif. (P) | 0.040 / n.s. | n.s. / n.s. | n.s. / n.s. | n.s. / n.s. | n.s. / n.s. | n.s. / n.s. |
| **bFGF / bFGF/TPC** | | | | | | |
| correlation | - / - | - / - | - / - | - / - | - / pos. | - / - |
| valid cases | 28 | 28 | 28 | 28 | 28 | 25 |
| signif. (P) | n.s. / n.s. | n.s. / n.s. | n.s. / n.s. | n.s. / n.s. | n.s. / 0.050 | n.s. / n.s. |
| **BMP-2 / BMP-2/TPC** | | | | | | |
| correlation | - / - | - / - | - / - | - / - | - / - | - / - |
| valid cases | 28 | 28 | 28 | 28 | 28 | 25 |
| signif. (P) | n.s. / n.s. | n.s. / n.s. | n.s. / n.s. | n.s. / n.s. | n.s. / n.s. | n.s. / n.s. |
| **BMP-7 / BMP-7/TPC** | | | | | | |
| correlation | - / - | - / - | - / - | - / - | pos. / - | - / - |
| valid cases | 28 | 28 | 28 | 28 | 28 | 25 |
| signif. (P) | n.s. / n.s. | n.s. / n.s. | n.s. / n.s. | n.s. / n.s. | 0.050 / n.s. | n.s. / n.s. |
| **Endoglin / Endoglin/TPC** | | | | | | |
| correlation | - / - | neg. / - | pos. / - | - / - | - / - | - / - |
| valid cases | 28 | 28 | 28 | 28 | 28 | 25 |
| signif. (P) | n.s. / n.s. | 0.038 / n.s. | 0.015 / - | n.s. / n.s. | n.s. / n.s. | n.s. / n.s. |
| **IGF-1 /IGF-1/TPC** | | | | | | |
| correlation | neg. / - | neg. / - | pos. / pos. | pos. / - | - / - | - / - |
| valid cases | 28 | 28 | 28 | 28 | 28 | 25 |
| signif. (P) | 0.018 / n.s. | 0.032 / n.s. | 0.001 / 0.021 | 0.030 / n.s. | n.s. / n.s. | n.s. / n.s. |
| **IGF-1R / IGF-1R/TPC** | | | | | | |
| correlation | neg. / neg. | neg. / - | - / - | - / - | neg. / neg. | neg. / - |
| valid cases | 28 | 28 | 28 | 28 | 28 | 25 |
| signif. (P) | 0.004 / 0.012 | 0.045 / n.s. | n.s. / n.s. | n.s. / n.s. | 0.001 / 0.005 | 0.006 / n.s. |
| **Aggrecan / Aggrecan/TPC** | | | | | | |
| correlation | - / - | - / - | - / - | - / - | - / - | - / pos. |
| valid cases | 28 | 28 | 28 | 28 | 28 | 25 |
| signif. (P) | n.s. / n.s. | n.s. / n.s. | n.s. / n.s. | n.s. / n.s. | n.s. / n.s. | n.s. / 0.048 |

**Table 4:** Correlation of intraarticular protein levels of patients with OCD with OCD stage according to Berndt and Harty, functional scores and OA-related changes in conventional X-ray or MRI, signif. (P): p-value for statistical significance Spearman’s ρ, FFI: foot function index, CFSS: calcaneal fractures scoring system according to Kerr, AOFAS: ankle-hindfoot scale, KLS: Kellgren Lawrence Score, AOSS: ankle osteoarthritis scoring system, TPC: total protein content. Statistical tests refer to correlations to the absolute protein concentrations and the protein concentrations in relation to TPC.
